# Supplementary material for: Association between Depression Severity and Physical Function among Chinese Nursing Home Residents: The Mediating Role of Different Types of Leisure Activities
Source: MDPI journal article supplement (doi:10.3390/ijerph19063543), 2022-03-16
Supplement: s1 [file s1]

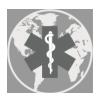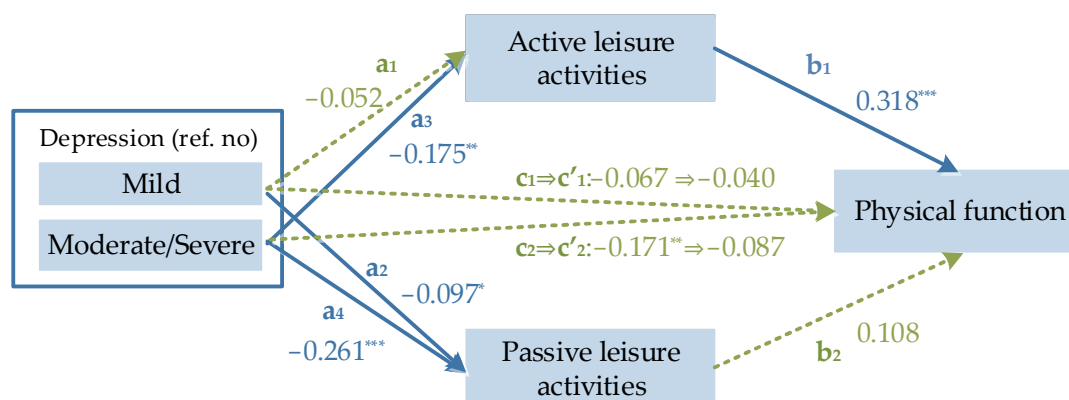

**Figure S1.** The mediating role of active and passive leisure activities in the association between depression and physical function (only adjusted for age and sex in the models,  $n = 353$ ). Standardized coefficients are shown along the path arrows; solid lines represent statistical significance at  $p < .05$ , and dashed lines represent nonsignificant effects; Path  $a_1$  represents the effect of mild depression on active leisure activities; Path  $a_2$  represents the effect of mild depression on passive leisure activities; Path  $a_3$  represents the effect of moderate/severe depression on active leisure activities; Path  $a_4$  represents the effect of moderate/severe depression on passive leisure activities; Path  $b_1$  represents the effect of active leisure activities on physical function; Path  $b_2$  represents the effect of passive leisure activities on physical function; Path  $c_1$  indicates the total effect of mild depression on physical function; Path  $c'_1$  represents the direct effect of mild depression on physical function; Path  $c_2$  indicates the total effect of moderate/severe depression on physical function; Path  $c'_1$  represents the direct effect of moderate/severe depression on physical function;  $*p < .05$ ,  $**p < .01$ ,  $***p < .001$ .

**Table S1.** Bootstrap tests for the mediating effects of active and passive leisure activities ( $n = 353$ ), adjusted for age and sex in the model.

| Effect                     | Mild <sup>a</sup> |               | Moderate/severe <sup>a</sup> |                |             |
|----------------------------|-------------------|---------------|------------------------------|----------------|-------------|
|                            | Coefficient       | 95% CI        | Coefficient                  | 95% CI         | Effect size |
| Total indirect effect      | -0.027            | -0.069, 0.015 | -0.084**                     | -0.135, -0.038 | 49%         |
| Specific indirect effect   |                   |               |                              |                |             |
| Active leisure activities  | -0.017            | -0.056, 0.018 | -0.056*                      | -0.095, -0.020 | 33%         |
| Passive leisure activities | -0.011            | -0.036, 0.001 | -0.028                       | -0.069, 0.002  | 16%         |

Note: CI: confidence interval;  $**p < .01$ ,  $*p < .05$

<sup>a</sup>Reference group: no depression

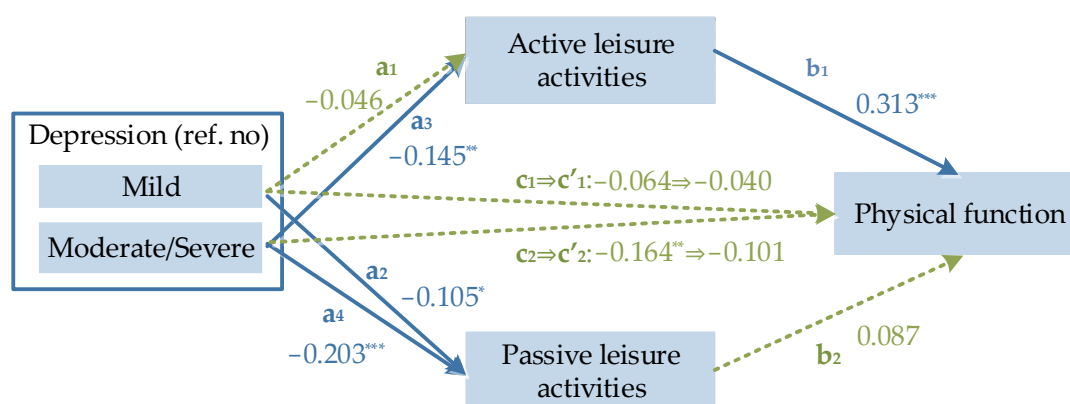

**Figure S2.** The mediating role of active leisure activities and cognitive (passive) leisure activities in the association between and physical function (removed “watching television/listening to the radio/watching theatrical performances” from the category of passive leisure activities and renamed cognitive leisure activities,  $n = 353$ ). Standardized coefficients are shown along the path arrows; solid lines represent statistical significance at  $p < .05$ , and dashed lines represent nonsignificant effects; adjusted for age, sex, years of schooling, having a spouse, self-reported economic conditions, comorbidity conditions, and body mass index; Path  $a_1$  represents the effect of mild depression on active leisure activities; Path  $a_2$  represents the effect of mild depression on passive leisure activities; Path  $a_3$  represents the effect of moderate/severe depression on active leisure activities; Path  $a_4$  represents the effect of moderate/severe depression on passive leisure activities; Path  $b_1$  represents the effect of active leisure activities on physical function; Path  $b_2$  represents the effect of passive leisure activities on physical function; Path  $c_1$  indicates the total effect of mild depression on physical function; Path  $c'_1$  represents the direct effect of mild depression on physical function; Path  $c_2$  indicates the total effect of moderate/severe depression on physical function; Path  $c'_2$  represents the direct effect of moderate/severe depression on physical function;  $*p < .05$ ,  $**p < .01$ ,  $***p < .001$ .

**Table S2.** Bootstrap tests for the mediating effects of active leisure activities and cognitive leisure activities (removed “watching television/listening to the radio/watching theatrical performances” from the category of passive leisure activities and reclassified them as cognitive leisure activities,  $n = 353$ )

| Effect                       | Mild <sup>a</sup> |               | Moderate/severe <sup>a</sup> |                | Effect size |
|------------------------------|-------------------|---------------|------------------------------|----------------|-------------|
|                              | Coefficient       | 95% CI        | Coefficient                  | 95% CI         |             |
| Total indirect effect        | -0.023            | -0.064, 0.016 | -0.063**                     | -0.111, -0.021 | 38%         |
| Specific indirect effect     |                   |               |                              |                |             |
| Active leisure activities    | -0.014            | -0.051, 0.018 | -0.045*                      | -0.084, -0.013 | 27%         |
| Cognitive leisure activities | -0.009            | -0.032, 0.002 | -0.018                       | 0.051, 0.005   | 11%         |

Note: CI: confidence interval;  $**p < .01$ ,  $*p < .05$

<sup>a</sup>Reference group: no depression

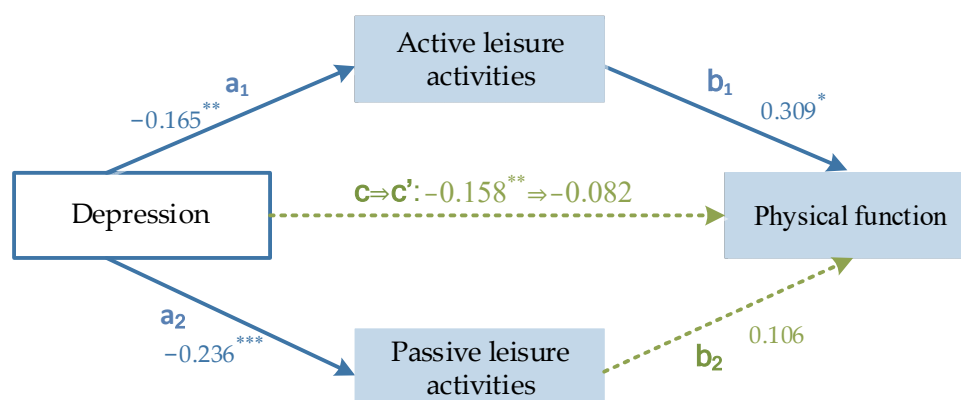

**Figure S3.** The mediating role of active and passive leisure activities in the association between and physical function (using depression as a continuous variable,  $n = 353$ ). Standardized coefficients are shown along the path arrows; solid lines represent statistical significance at  $p < .05$ , and dashed lines represent nonsignificant effects; adjusted for age, sex, years of schooling, having a spouse, self-reported economic conditions, comorbidity conditions, and body mass index; Path  $a_1$  represents the effect of depression on active leisure activities; Path  $a_2$  represents the effect of depression on passive leisure activities; Path  $b_1$  represents the effect of active leisure activities on physical function; Path  $b_2$  represents the effect of passive leisure activities on physical function; Path  $c$  indicates the total effect of depression on physical function; Path  $c'$  represents the direct effect of depression on physical function;  $^*p < .05$ ,  $^{**}p < .01$ ,  $^{***}p < .001$ .

**Table S3.** Bootstrap tests for the mediating effects of active and passive leisure activities (using depression as a continuous variable,  $n = 353$ )

| Effect                     | Bootstrapped distribution |                  |             |
|----------------------------|---------------------------|------------------|-------------|
|                            | Coefficient               | 95% CI           | Effect size |
| Total indirect effect      | $-0.076^{**}$             | $-0.122, -0.033$ | 48%         |
| Specific indirect effect   |                           |                  |             |
| Active leisure activities  | $-0.051^*$                | $-0.060, -0.002$ | 32%         |
| Passive leisure activities | $-0.025$                  | $-0.091, 0.019$  | 16%         |

Note: CI: confidence interval;  $^{**}p < .01$ ,  $^*p < .05$

<sup>a</sup>Reference group: no depression

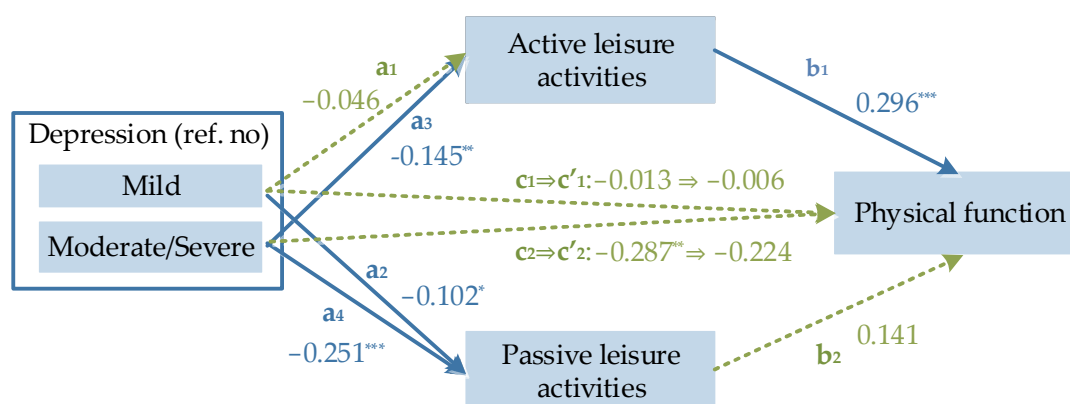

**Figure S4.** The mediating role of active and passive leisure activities in the association between depression and physical function (using physical function as the dichotomous outcome,  $n = 353$ ). Standardized coefficients are shown along the path arrows; solid lines represent statistical significance at  $p < .05$ , and dashed lines represent nonsignificant effects; adjusted for age, sex, years of schooling, having a spouse, self-reported economic conditions, comorbidity conditions, and body mass index; Path  $a_1$  represents the effect of mild depression on active leisure activities; Path  $a_2$  represents the effect of mild depression on passive leisure activities; Path  $a_3$  represents the effect of moderate/severe depression on active leisure activities; Path  $a_4$  represents the effect of moderate/severe depression on passive leisure activities; Path  $b_1$  represents the effect of active leisure activities on physical function; Path  $b_2$  represents the effect of passive leisure activities on physical function; Path  $c_1$  indicates the total effect of mild depression on physical function; Path  $c'_1$  represents the direct effect of mild depression on physical function; Path  $c_2$  indicates the total effect of moderate/severe depression on physical function; Path  $c'_2$  represents the direct effect of moderate/severe depression on physical function;  $*p < .05$ ,  $**p < .01$ ,  $***p < .001$ .

**Table S4.** Bootstrap tests for the mediating effects of active and passive leisure activities (using physical function as a dichotomous variable,  $n = 353$ )

| Effect                     | Mild depression <sup>a</sup> |               | Moderate/severe depression <sup>a</sup> |               | Effect size |
|----------------------------|------------------------------|---------------|-----------------------------------------|---------------|-------------|
|                            | Coefficient                  | 95% CI        | Coefficient                             | 95% CI        |             |
| Total indirect effect      | 0.028                        | -0.003, 0.088 | 0.078**                                 | 0.034, 0.161  | 27%         |
| Specific indirect effect   |                              |               |                                         |               |             |
| Active leisure activities  | 0.014                        | -0.010, 0.062 | 0.043*                                  | 0.015, 0.103  | 15%         |
| Passive leisure activities | 0.014                        | -0.001, 0.050 | 0.035                                   | -0.002, 0.099 | 12%         |

Note: CI: confidence interval;  $**p < .01$ ,  $*p < .05$

<sup>a</sup> Reference group: no depression
